# Supplementary material for: Silvopastoral Systems in Practice: Evidence from a Dairy Value Chain Intervention in Caquetá, Colombia
Source: Research Square preprint supplement (doi:10.21203/rs.3.rs-8057588/v1), 2025-12-15
Supplement: Supplementary file 1 [file f674b2669ee492914eadece4.docx]

Supplementary Appendix

**Figures and tables**

**Table A.1** Marginal Effects. Logit Model. Treatment Effect on Attrition

| **Variable** | **Attrition-Dummy** | | | |
| --- | --- | --- | --- | --- |
| **(1)** | **(2)** | **(3)** | **(4)** |
| **Treatᵢ = 1** | -0.020 | -0.015 | 0.017 | 0.024 |
|  | (0.037) | (0.038) | (0.037) | (0.026) |
| Observations | 488 | 480 | 406 | 399 |
| Farm Controls | NO | YES | NO | YES |
| Practices Controls | NO | NO | YES | YES |

[*] Note: *** p < 0.01; ** p < 0.05; * p < 0.1.

**Table A.2** Descriptive Variables for Rural Properties with/without Propensity Score Matching (PSM)

| **Properties** | **Polygon Length (Hectares)** | **Polygon Width (Hectares)** | **Distance to Florencia (degrees)** | **Altitude (meters)** | **Observations** |
| --- | --- | --- | --- | --- | --- |
| Controls | 0.3640 | 60.3 | 0.542 | N.A | 2181 |
| Treated | 0.4890 | 143 | 0.606 | N.A | 415 |
| **Panel B) Propensity (length, width, distance)** | | | | | |
| Controls | 0.4250 | 78.3 | 0.564 | N.A | 397 |
| Treated | 0.3880 | 67.1 | 0.564 | N.A | 397 |
| **Panel C) Propensity (length, width, distance, altitude)** | | | | | |
| Controls | 0.5010 | 105 | 0.603 | 282 | 252 |
| Treated | 0.4690 | 92 | 0.632 | 282 | 252 |
